# Supplementary material for: APOE2 is associated with longevity independent of Alzheimer’s disease
Source: eLife. 2020 Oct 19;9:e62199. doi: 10.7554/eLife.62199 (PMC7588231; doi:10.7554/eLife.62199)
Supplement: Figure 2—source data 1. [file elife-62199-fig2-data1.xlsx]

## Sheet: raw data of Fig2b
ID	Sex	Genotype	Age at death (day)	Found dead/euthanized	note	dead or alive (for censor)
F1-1	Female	E3	520	euthanized	euthanized, mass	0
F1-2	Female	E3	552	found dead	found dead	0
F1-3	Female	E3	880	euthanized	euthanized	0
F1-4	Female	E3	845	euthanized	euthanzied, weight loss	0
F2-1	Female	E3	507	found dead	dead, unknown	0
F2-2	Female	E3	783	euthanized	euthanized weight loss	0
F2-3	Female	E3	831	found dead	found dead	0
F2-4	Female	E3	825	found dead	found dead	0
F3-1	Female	E3	722	euthanized	euthanized	0
F3-2	Female	E3	806	found dead	found dead	0
F3-3	Female	E3	813	found dead		0
F3-4	Female	E3	820	found dead		0
F4-1	Female	E4	671	euthanized	tumore suc	0
F4-2	Female	E4	747	found dead	found dead	0
F4-3	Female	E4	770	euthanized	tumore suc	0
F4-4	Female	E4	948	euthanized	euthanized UD	0
F4-5	Female	E4	987	found dead	found dead	0
F5-1	Female	E4	607	found dead	found dead	0
F5-2	Female	E4	607	found dead	found dead	0
F5-3	Female	E4	928	found dead	found dead	0
F5-4	Female	E4	936	found dead	found dead	0
F5-5	Female	E4	936	euthanized	euthanized tumor	0
F6-1	Female	E4	765	euthanized	euthanized lethergic	0
F6-2	Female	E4	772	found dead	found dead	0
F6-3	Female	E4	796	euthanized	euth legergic	0
F6-4	Female	E4	831	euthanized	UD	0
F6-5	Female	E4	885	found dead	found dead	0
F7-1	Female	E2	560	euthanized	euthanized, recurrent UD	0
F7-2	Female	E2	943	found dead	found dead	0
F7-3	Female	E2	818	euthanized	tumor, euthanized	0
F7-4	Female	E2	825	euthanized	abdominal tumor, euth	0
F8-1	Female	E2	597	found dead		0
F8-2	Female	E2	943	found dead	found dead	0
F8-3	Female	E2	895	euthanized	euth, skin	0
F8-4	Female	E2	949	found dead	found dead	0
F8-5	Female	E2	825	found dead	found dead	0
F9-1	Female	KO	609	euthanized	euthanized, hunched, dyspnea, eyes, UD	0
F9-2	Female	KO	660	found dead		0
F9-3	Female	KO	660	found dead		0
F9-4	Female	KO	790	euthanized	euth lethergic	0
F10-1	Female	KO	651	found dead		0
F10-2	Female	KO	678	found dead		0
F10-3	Female	KO	764	found dead		0
F10-4	Female	KO	823	found dead		0
F11-1	Female	KO	585	found dead	found dead	0
F11-2	Female	KO	631	euthanized	euthanized, suffering, bleeding	0
F12-1	Female	E2	999	euthanized	euthanized, hunched/scruffy, rectal prolapse	0
F12-2	Female	E2	975	found dead	found dead	0
F13-1	Female	E2	539	euthanized	euthanized, recurrent UD	0
F13-2	Female	E2	703	euthanized	euthanized, recurrent UD	0
F14-1	Female	E2	741	found dead		0
F14-2	Female	E2	917	found dead	found dead	0
F15-1	Female	KO	585	found dead	found dead	0
F15-2	Female	KO	622	found dead		0
F15-3	Female	KO	795	euthanized	euthanized, weight loss	0
F15-4	Female	KO	852	found dead		0
M1-1	Male	E3	772	found dead		0
M1-2	Male	E3	796	found dead	found dead	0
M2-1	Male	E3	940	found dead	found dead	0
M2-2	Male	E3	910	found dead	found dead	0
M2-3	Male	E3	944	found dead	found dead	0
M2-4	Male	E3	940	euthanized	euthanized moribound	0
M3-1	Male	E3	790	found dead	found dead	0
M3-2	Male	E3	853	found dead	found dead	0
M3-3	Male	E3	853	found dead	found dead	0
M3-4	Male	E3	853	found dead	found dead	0
M3-5	Male	E3	860	found dead	found dead	0
M4-1	Male	E4	457	found dead	dead	0
M4-2	Male	E4	587	found dead		0
M4-3	Male	E4	714	found dead	found dead	0
M4-4	Male	E4	753	found dead		0
M4-5	Male	E4	864	euthanized	euthanized, weight loss	0
M5-1	Male	E4	647	found dead		0
M5-2	Male	E4	688	found dead	found dead?	0
M5-3	Male	E4	741	found dead	found dead	0
M6-1	Male	E4	503	found dead		0
M6-2	Male	E4	696	found dead		0
M6-3	Male	E4	752	found dead		0
M6-4	Male	E4	790	euthanized	euth lethergic	0
M7-1	Male	E2	560	euthanized	euthanized, recurrent UD	0
M8-1	Male	E2	654	euthanized	euthanized hunched, UD	0
M8-2	Male	E2	780	found dead		0
M8-3	Male	E2	922	found dead	found dead	0
M8-4	Male	E2	1039	found dead	found dead	0
M9-1	Male	E2	722	euthanized		0
M9-2	Male	E2	971	euthanized	euthanized declined	0
M9-3	Male	E2	1021	euthanized	euthanized weight loss	0
M10-1	Male	KO	701	found dead	found dead	0
M10-2	Male	KO	743	found dead		0
M10-3	Male	KO	830	euthanized	euthanized, letergic	0
M11-1	Male	KO	703	found dead		0
M11-2	Male	KO	944	found dead	found dead	0
M11-3	Male	KO	990	found dead	found dead	0
M12-1	Male	KO	622	found dead		0
M12-2	Male	KO	893	found dead	found dead	0
M12-3	Male	KO	939	found dead	found dead	0
M12-4	Male	KO	993	euthanized	euthanized weight loss	0
M12-5	Male	KO	817	found dead	found dead	0
M13-1	Male	E3	660	euthanized	tumore euthanized	0
M14-1	Male	E4	707	found dead		0
M14-2	Male	E4	846	found dead	found dead	0
M15-1	Male	E2	911	found dead	found dead	0
M15-2	Male	E2	1022	euthanized	euthanized for animal inspection	1
M16-1	Male	KO	718	found dead		0
M16-2	Male	KO	931	found dead		0
M16-3	Male	KO	732	euthanized	euthanized UD	0
L1-1	Female	E4	1036	euthanized	euthanized weight loss	0
L1-2	Female	E4	949	found dead	found dead (mass?)	0
L1-3	Female	E4	718	found dead	found dead	0
L1-4	Female	E4	593	found dead		0
L1-5	Female	E4	545	found dead	found dead	0
L2-1	Female	E3	879	euthanized	euthanized weight loss	0
L2-2	Female	E3	559	found dead	found dead	0
L3-1	Female	E2	835	found dead	found dead	0
L3-2	Female	E2	959	found dead	found dead	0
L4-1	Male	E2	1015	euthanized	euthanized pennis prolapse	0
L4-2	Male	E2	1036	euthanized	euthanized, for end of project	1
L5-1	Male	E3	900	found dead	found dead	0
