# Supplementary material for: APOE2 is associated with longevity independent of Alzheimer’s disease
Source: eLife. 2020 Oct 19;9:e62199. doi: 10.7554/eLife.62199 (PMC7588231; doi:10.7554/eLife.62199)
Supplement: Figure 2—source data 2. [file elife-62199-fig2-data2.xlsx]

## Sheet: raw data of Fig2I_K
ID	Sex	Genotype	Age at death (day)	Travel distance (m)	Time mobile (%time)	Rearing events	Open: Closed arm ratio
F1-3	Female	E3	880	52.44	79.5667	80	0.165
F1-4	Female	E3	845	42.485	83.2889	24	0.058
F2-2	Female	E3	783	46.621	82.3	90	0.031
F2-3	Female	E3	831	39.247	75.8444	30	0.072
F2-4	Female	E3	825	44.907	70.1111	40	0.268
F3-1	Female	E3	722	9.906	22.9667	0	0.007
F3-2	Female	E3	806	44.663	79.5222	83	0.012
F3-3	Female	E3	813	43.195	77.4	81	0.001
F3-4	Female	E3	820	45.67	78.3	63	0.049
F4-2	Female	E4	747	0.552	1.58889	6	0
F4-3	Female	E4	770	46.098	71.5889	118	0.005
F4-4	Female	E4	948	8.146	20.4889	7	0.018
F4-5	Female	E4	987	46.089	73.6667	49	0
F5-3	Female	E4	928	38.576	71.2222	44	0.006
F5-4	Female	E4	936	33.676	60.5222	55	0.006
F5-5	Female	E4	936	30.2	56.0111	52	0.022
F6-1	Female	E4	765	14.635	36.6333	65	0
F6-2	Female	E4	772	25.522	52.1111	9	0.024
F6-3	Female	E4	796	44.503	70.3333	64	0
F6-4	Female	E4	831	42.303	62.4889	105	0.024
F6-5	Female	E4	885	30.3	55.6556	67	0.075
F7-2	Female	E2	943	42.944	66.0556	108	0.128
F7-3	Female	E2	818	45.037	74.8222	94	0
F7-4	Female	E2	825	45.012	77.5222	139	0.008
F8-2	Female	E2	943	30.297	54.7667	22	0.055
F8-3	Female	E2	895	40.569	54.5111	86	0.006
F8-4	Female	E2	949	45.659	58.3222	74	0.004
F8-5	Female	E2	825	46.315	70.0778	124	0.136
F9-4	Female	KO	790	28.419	41.2333	38	0.028
F10-3	Female	KO	764	21.099	40.2889	12	0.011
F10-4	Female	KO	823	24.569	45.6222	42	0.001
F12-1	Female	E2	999	58.118	71.0333	265	0.322
F12-2	Female	E2	975	68.074	87.7111	132	0.113
F14-1	Female	E2	741	23.575	41.8	45	0
F14-2	Female	E2	917	43.168	65.5667	101	0.009
F15-3	Female	KO	795	50.759	69.8889	35	0
F15-4	Female	KO	852	33.698	54.9778	90	0.085
M1-1	Male	E3	772	12.617	28.3444	16	0.019
M1-2	Male	E3	796	26.112	52.2222	55	0.002
M2-1	Male	E3	940	33.267	65.5667	56	0.01
M2-2	Male	E3	910	37.838	75.2667	49	0.054
M2-3	Male	E3	944	33.131	68.7333	72	0.011
M2-4	Male	E3	940	46.236	85.8	126	0.014
M3-1	Male	E3	790	6.804	14.2556	24	0.008
M3-2	Male	E3	853	6.108	17.6667	2	0
M3-3	Male	E3	853	14.05	30.5889	1	0.073
M3-4	Male	E3	853	24.163	46.9111	48	0.193
M3-5	Male	E3	860	23.847	50.9444	41	0.028
M4-4	Male	E4	753	3.218	9.05556	9	0.002
M4-5	Male	E4	864	29.101	49.6444	43	0
M5-3	Male	E4	741	23.955	51	33	0
M6-3	Male	E4	752	18.66	37.2444	25	0.005
M6-4	Male	E4	790	17.413	39.6556	11	0.012
M8-2	Male	E2	780	20.713	36.5778	11	0
M8-3	Male	E2	922	32.624	52.3111	88	0.058
M8-4	Male	E2	1039	45.236	71.6889	186	0.008
M9-1	Male	E2	722	13.17	28.6222	44	0.05
M9-2	Male	E2	971	23.679	44.3889	34	0
M9-3	Male	E2	1021	54.046	73.5778	92	0
M10-2	Male	KO	743	9.172	21.6778	3	0.018
M10-3	Male	KO	830	14.702	36.4667	42	0
M11-1	Male	KO	703	17.274	39.2778	12	0.009
M11-2	Male	KO	944	17.406	34.6778	53	0.01
M11-3	Male	KO	990	22.464	41.1778	46	0.002
M12-2	Male	KO	893	29.991	51.8556	32	0.015
M12-3	Male	KO	939	10.076	22.1111	12	0.009
M12-4	Male	KO	993	14.966	30.7	45	0
M12-5	Male	KO	817	9.431	24.2333	17	0.011
M14-2	Male	E4	846	18.956	33.3111	31	0.004
M15-1	Male	E2	911	59.731	81.4222	213	0.009
M15-2	Male	E2	1022	62.564	78.1556	166	0.179
M16-1	Male	KO	718	37.02	61.5333	45	0
M16-2	Male	KO	931	27.525	57.8778	62	0.002
M16-3	Male	KO	732	19.648	41.3667	29	0.013
