# Supplementary material for: APOE2 is associated with longevity independent of Alzheimer’s disease
Source: eLife. 2020 Oct 19;9:e62199. doi: 10.7554/eLife.62199 (PMC7588231; doi:10.7554/eLife.62199)
Supplement: Figure 2—source data 3. [file elife-62199-fig2-data3.xlsx]

## Sheet: Sheet1
Test	Animal	Genotype	Sex	Age Group	Travel distance (m)	Time mobile (%time)	Rearing events
1	1	E3	Female	Old	52.44	79.5667	80
2	2	E3	Female	Old	42.485	83.2889	24
3	3	E3	Female	Old	46.621	82.3	90
4	4	E3	Female	Old	39.247	75.8444	30
5	5	E3	Female	Old	44.907	70.1111	40
6	6	E3	Female	Old	44.663	79.5222	83
7	7	E3	Female	Old	43.195	77.4	81
8	8	E3	Female	Old	45.67	78.3	63
9	9	E3	Female	Old	9.906	22.9667	0
10	10	E4	Female	Old	8.146	20.4889	7
11	11	E4	Female	Old	46.098	71.5889	118
12	12	E4	Female	Old	46.089	73.6667	49
13	13	E4	Female	Old	0.552	1.58889	6
14	14	E4	Female	Old	30.2	56.0111	52
15	15	E4	Female	Old	33.676	60.5222	55
16	16	E4	Female	Old	38.576	71.2222	44
17	17	E4	Female	Old	42.303	62.4889	105
18	18	E4	Female	Old	30.3	55.6556	67
19	19	E4	Female	Old	44.503	70.3333	64
20	20	E4	Female	Old	25.522	52.1111	9
21	21	E4	Female	Old	14.635	36.6333	65
22	22	E2	Female	Old	42.944	66.0556	108
23	23	E2	Female	Old	45.012	77.5222	139
24	24	E2	Female	Old	45.037	74.8222	94
25	25	E2	Female	Old	46.315	70.0778	124
26	26	E2	Female	Old	30.297	54.7667	22
27	28	E2	Female	Old	45.659	58.3222	74
28	27	E2	Female	Old	40.569	54.5111	86
29	29	KO	Female	Old	28.419	41.2333	38
30	30	KO	Female	Old	21.099	40.2889	12
31	31	KO	Female	Old	24.569	45.6222	42
32	32	E2	Female	Old	58.118	71.0333	265
33	33	E2	Female	Old	68.074	87.7111	132
34	34	E2	Female	Old	23.575	41.8	45
35	35	E2	Female	Old	43.168	65.5667	101
36	36	KO	Female	Old	50.759	69.8889	35
37	37	KO	Female	Old	33.698	54.9778	90
38	38	E3	Male	Old	12.617	28.3444	16
39	39	E3	Male	Old	26.112	52.2222	55
40	40	E3	Male	Old	33.267	65.5667	56
41	41	E3	Male	Old	37.838	75.2667	49
42	42	E3	Male	Old	33.131	68.7333	72
43	43	E3	Male	Old	46.236	85.8	126
44	44	E3	Male	Old	6.108	17.6667	2
45	45	E3	Male	Old	6.804	14.2556	24
46	46	E3	Male	Old	14.05	30.5889	1
47	47	E3	Male	Old	24.163	46.9111	48
48	48	E3	Male	Old	23.847	50.9444	41
49	49	E4	Male	Old	29.101	49.6444	43
50	50	E4	Male	Old	3.218	9.05556	9
51	51	E4	Male	Old	23.955	51	33
52	52	E4	Male	Old	17.413	39.6556	11
53	53	E4	Male	Old	18.66	37.2444	25
54	54	E2	Male	Old	32.624	52.3111	88
55	56	E2	Male	Old	20.713	36.5778	11
56	55	E2	Male	Old	45.236	71.6889	186
57	57	E2	Male	Old	23.679	44.3889	34
58	58	E2	Male	Old	13.17	28.6222	44
59	59	E2	Male	Old	54.046	73.5778	92
60	60	KO	Male	Old	9.172	21.6778	3
61	61	KO	Male	Old	14.702	36.4667	42
62	62	KO	Male	Old	22.464	41.1778	46
63	64	KO	Male	Old	17.274	39.2778	12
64	63	KO	Male	Old	17.406	34.6778	53
65	65	KO	Male	Old	14.966	30.7	45
66	66	KO	Male	Old	10.076	22.1111	12
67	67	KO	Male	Old	29.991	51.8556	32
68	68	KO	Male	Old	9.431	24.2333	17
69	69	E4	Male	Old	18.956	33.3111	31
70	70	E2	Male	Old	62.564	78.1556	166
71	72	KO	Male	Old	27.525	57.8778	62
72	71	E2	Male	Old	59.731	81.4222	213
73	73	KO	Male	Old	37.02	61.5333	45
74	74	KO	Male	Old	19.648	41.3667	29
75	1	E3	Female	Young	44.755	84.8778	43
76	2	E3	Female	Young	46.436	86.3778	46
77	3	E3	Female	Young	22.59	58.0444	0
78	4	E3	Female	Young	29.653	73.9333	10
79	5	E3	Female	Young	37.827	75.8333	66
80	6	E3	Female	Young	39.096	75.0778	125
81	7	E3	Female	Young	43.838	85.1222	133
82	8	E3	Female	Young	41.396	83.9	68
83	9	E3	Female	Young	57.131	90.3	136
84	10	E3	Female	Young	53.324	89.9667	103
85	11	E3	Female	Young	42.779	81.8667	87
86	12	E3	Female	Young	56.394	89.4222	42
87	13	E3	Female	Young	57.847	88.0889	113
88	14	E3	Female	Young	32.347	74.9556	71
89	15	E3	Female	Young	50.981	86	122
90	16	E4	Female	Young	47.054	81	134
91	17	E4	Female	Young	58.854	91.1556	155
92	18	E4	Female	Young	43.055	83.3667	80
93	19	E4	Female	Young	58.306	89.3333	64
94	20	E4	Female	Young	76.27	94.3889	58
95	21	E4	Female	Young	50.444	89.6889	109
96	22	E4	Female	Young	50.909	86.3889	82
97	23	E4	Female	Young	40.478	74.0889	87
98	24	E4	Female	Young	46.797	83.1889	113
99	25	E4	Female	Young	41.46	77.6667	94
100	26	E4	Female	Young	41.949	75.7778	114
101	27	E4	Female	Young	66.668	88.4667	245
102	28	E4	Female	Young	48.787	85.6778	57
103	29	E4	Female	Young	55.818	88.3	116
104	30	E4	Female	Young	46.165	80.4444	164
105	31	E2	Female	Young	50.007	79.9889	201
106	32	E2	Female	Young	63.576	88.8111	145
107	33	E2	Female	Young	36.977	68.1778	116
108	34	E2	Female	Young	51.447	78.3111	153
109	36	E2	Female	Young	37.325	66	91
110	37	E2	Female	Young	53.676	83.1333	62
111	38	E2	Female	Young	49.645	78.0667	124
112	39	E2	Female	Young	40.364	68.2889	128
113	40	E2	Female	Young	40.041	67.0556	149
114	41	KO	Female	Young	34.671	73.6556	94
115	42	KO	Female	Young	34.387	68.7889	85
116	43	KO	Female	Young	44.257	79.1444	112
117	44	KO	Female	Young	40.751	76.5889	128
118	46	KO	Female	Young	42.937	79.8889	38
119	47	KO	Female	Young	54.829	85.4222	100
120	48	KO	Female	Young	22.855	53.9778	41
121	49	KO	Female	Young	34.393	69.0778	95
122	50	KO	Female	Young	35.113	69.3889	81
123	51	KO	Female	Young	41.628	71.9444	111
124	53	KO	Female	Young	61.71	87.0444	110
125	55	KO	Female	Young	47.894	75.6556	108
126	1	E3	Male	Young	32.096	73.4667	75
127	2	E3	Male	Young	47.876	84.1222	174
128	3	E3	Male	Young	45.64	82.1778	138
129	4	E3	Male	Young	52.295	88.3	55
130	5	E3	Male	Young	37.926	82.6222	75
131	6	E3	Male	Young	31.74	72.6	121
132	7	E3	Male	Young	48.003	86.8333	175
133	8	E3	Male	Young	44.38	82.2	106
134	9	E3	Male	Young	58.47	85.0444	173
135	10	E3	Male	Young	44.685	78.9	140
136	11	E3	Male	Young	46.043	76.5111	176
137	12	E3	Male	Young	37.557	73.4556	46
138	13	E3	Male	Young	37.411	71.1111	142
139	14	E3	Male	Young	42.148	81.8667	96
140	15	E3	Male	Young	37.517	73.6333	150
141	16	E4	Male	Young	21.014	42.0556	78
142	17	E4	Male	Young	44.235	79.4111	77
143	18	E4	Male	Young	30.05	66.2889	57
144	19	E4	Male	Young	33.553	74.4444	61
145	20	E4	Male	Young	54.45	88.6556	75
146	21	E4	Male	Young	33.18	73.3111	85
147	22	E4	Male	Young	34.221	63.1889	114
148	23	E4	Male	Young	39.719	69.7889	175
149	24	E4	Male	Young	24.378	57	57
150	25	E4	Male	Young	46.79	87.2667	109
151	26	E4	Male	Young	44.048	78.2444	163
152	27	E4	Male	Young	28.248	63.1667	71
153	28	E2	Male	Young	45.951	67.7	90
154	29	E2	Male	Young	58.186	83.1889	207
155	30	E2	Male	Young	58.597	81.8	150
156	31	E2	Male	Young	41.053	69.1222	163
157	32	E2	Male	Young	37.334	67.1444	145
158	33	E2	Male	Young	37.793	68.7444	99
159	34	E2	Male	Young	50.238	85.5556	76
160	35	E2	Male	Young	59.407	88.0333	139
161	36	E2	Male	Young	47.108	80.5111	66
162	37	E2	Male	Young	41.139	78.3556	97
163	38	E2	Male	Young	57.623	86.6111	127
164	39	E2	Male	Young	63.443	87.4778	180
165	40	E2	Male	Young	61.526	80.6667	97
166	41	KO	Male	Young	41.076	67	86
167	42	KO	Male	Young	34.886	69.8333	77
168	43	KO	Male	Young	38.532	69.5333	85
169	44	KO	Male	Young	40.28	77.1778	47
170	45	KO	Male	Young	26.971	55.0333	143
171	46	KO	Male	Young	40.984	72.4222	115
172	47	KO	Male	Young	32.033	66.3	82
173	48	KO	Male	Young	41.567	78.4222	105
174	49	KO	Male	Young	41.2	80.7444	132
175	50	KO	Male	Young	43.422	76.4111	111
176	51	KO	Male	Young	46.657	81.4778	76
