# Supplementary material for: APOE2 is associated with longevity independent of Alzheimer’s disease
Source: eLife. 2020 Oct 19;9:e62199. doi: 10.7554/eLife.62199 (PMC7588231; doi:10.7554/eLife.62199)
Supplement: Figure 2—source data 4. [file elife-62199-fig2-data4.xlsx]

## Sheet: raw data of Fig2N&O
ID	Sex	Genotype	Age at death (day)	Session 1	Session 2	Session 3	Session 4	Session 5	Session 6	Session 7	Session 8	Weight (g)
F1-3	Female	E3	880	11	28	17	35	10	29	40	97	32
F1-4	Female	E3	845	11	55	106	39	41	71	85	66	25
F2-2	Female	E3	783	124	31	198	164	164	193	127	222	25
F2-3	Female	E3	831	27	87	76	123	144	172	40	214	31
F2-4	Female	E3	825	74	55	149	222	243	287	238	244	25
F3-2	Female	E3	806	37	0	83	26	29	47	77	92	32
F3-3	Female	E3	813	68	62	133	78	158	183	157	95	29
F3-4	Female	E3	820	53	52	69	98	93	155	97	143	29
F3-1	Female	E3	722	4	11	0	10	26	35	15	17	18
F4-4	Female	E4	948	210	231	252	124	217	300	300	259	23
F4-3	Female	E4	770	36	85	48	113	38	123	106	105	35
F4-5	Female	E4	987	88	57	94	103	133	169	189	145	31
F4-2	Female	E4	747	11	44	6	46	20	29	33	48	27
F5-5	Female	E4	936	43	51	85	38	48	78	42	49	29
F5-4	Female	E4	936	17	34	62	0	40	34	45	44	29
F5-3	Female	E4	928	44	50	19	138	195	200	279	72	27
F6-4	Female	E4	831	54	53	73	48	109	66	124	114	37
F6-5	Female	E4	885	17	32	26	29	52	61	36	50	29
F6-3	Female	E4	796	8	0	16	58	56	52	56	73	35
F6-2	Female	E4	772	69	65	68	53	65	41	59	92	29
F6-1	Female	E4	765	2	9	48	20	73	75	83	64	29
F7-2	Female	E2	943	8	23	41	98	136	110	56	163	29
F7-4	Female	E2	825	68	107	99	110	106	90	62	52	26
F7-3	Female	E2	818	18	33	89	44	50	117	177	27	30
F8-5	Female	E2	825	60		114	45	131	77	63	144	32
F8-2	Female	E2	943	50	32	155	61	129	95	115	58	24
F8-3	Female	E2	895	57	39	102	36	100	39	66	34	29
F8-4	Female	E2	949	37	33	71	33	73	115	61	41	33
F9-4	Female	KO	790	5	54	88	113	170	89	136	102	34
F10-3	Female	KO	764	37	91	121	63	87	151	63	47	27
F10-4	Female	KO	823	9	67	47	74	64	108	84	116	33
F12-1	Female	E2	999	24	203	38	152	137	136	62	154	27
F12-2	Female	E2	975	21	27	52	65	70	78	80	63	33
F14-1	Female	E2	741	131	124	147	168	179	169	166	225	26
F14-2	Female	E2	917	154	183	117	160	189	180	178	245	28
F15-3	Female	KO	795	5	57	68	57	40	51	67	62	27
F15-4	Female	KO	852	12	32	76	124	133	104	165	98	30
M1-1	Male	E3	772	43	152	145	106	140	148	268	251	18
M1-2	Male	E3	796	20	55	100	95	118	144	100	100	31
M2-1	Male	E3	940	19	23	27	62	70	51	68	64	36
M2-2	Male	E3	910	28	89	21	74	83	115	92	88	38
M2-3	Male	E3	944	18	43	88	117	67	112	66	74	38
M2-4	Male	E3	940	32	28	60	58	76	64	89	67	37
M3-2	Male	E3	853	10	6	44	69	54	37	124	109	31
M3-1	Male	E3	790	22	97	120	165	153	136	180	172	23
M3-3	Male	E3	853	87	4	69	70	152	195	165	210	32
M3-4	Male	E3	853	41	34	80	67	65	65	69	104	32
M3-5	Male	E3	860	68		39	57	135	139	119	156	30
M4-5	Male	E4	864	23	32	61	51	67	51	64	39	33
M4-4	Male	E4	753	6	5	7	7	8	3	9	12	37
M5-3	Male	E4	741	48	47	42	63	45	71	43	39	31
M6-4	Male	E4	790	26	19	20	39	15	37	39	45	32
M6-3	Male	E4	752	37	33	23	56	19	11	4	27	33
M8-3	Male	E2	922	74	124	37	46	72	168	157	98	27
M8-4	Male	E2	1039	86	63	103	134	78	73	87	89	32
M8-2	Male	E2	780	21	26	92	51	79	98	132	229	28
M9-2	Male	E2	971	13	39	62	59	74	39	50	61	23
M9-1	Male	E2	722	67	46	179	221	226	132	162	214	26
M9-3	Male	E2	1021	1	33	6	27	8	14	75	34	32
M10-2	Male	KO	743	89	96	152	163	149	78	179	165	22
M10-3	Male	KO	830	14	98	83	61	48	15	118	73	32
M11-3	Male	KO	990	4	36	34	31	22	35	63	45	36
M11-2	Male	KO	944	2	2	42	36	27	27	38	8	35
M11-1	Male	KO	703	6	0	16	21	15	27	28	28	34
M12-4	Male	KO	993	97	66	82	159	119	169	167	199	33
M12-3	Male	KO	939	34	34	20	56	64	74	51	87	29
M12-2	Male	KO	893	73	94	138	95	77	99	93	151	31
M12-5	Male	KO	817	5	12	17	15	35	20	80	55	33
M14-2	Male	E4	846	23	38	46	40	31	29	30	29	35
M15-2	Male	E2	1022	109	84	105	38	105	130	106	138	39
M15-1	Male	E2	911	38	32	73	38	87	133	103	42	36
M16-2	Male	KO	931	6	8	38	49	32	31	58	38	34
M16-1	Male	KO	718	39	1	42	66	31	29	66	48	34
M16-3	Male	KO	732	34	62	119	97	60	71	85	73	33
