# Supplementary material for: APOE2 is associated with longevity independent of Alzheimer’s disease
Source: eLife. 2020 Oct 19;9:e62199. doi: 10.7554/eLife.62199 (PMC7588231; doi:10.7554/eLife.62199)
Supplement: Figure 4—source data 1. [file elife-62199-fig4-data1.xlsx]

## Sheet: raw data of Fig4B_D
ID	Sex	Genotype	Age Group	weight (g)	Age (m)	Travel distance (m)	Time mobile (%)	Rearing events
1	Female	E4	Young	23.9	7.46711	36.981	76.9889	73
2	Female	E4	Young	23.6	7.46711	32.408	75.7889	77
3	Female	E4	Young	21.2	7.46711	37.304	76.1111	86
4	Female	E4	Young	22.6	7.46711	35.765	79.6	62
5	Female	E4	Young	22.6	7.36842	51.067	82.0778	76
6	Female	E4	Young	21.7	7.36842	46.571	84.3222	89
7	Female	E4	Young	23.8	7.36842	66.171	89.0444	78
8	Female	E4	Young	24	7.36842	57.062	86.5556	75
9	Female	E4	Young	22.5	7.36842	42.648	81.6778	41
10	Female	E4	Young	22.8	6.64474	47.151	85.2778	78
15	Female	E3	Young	19.9	7.73026	54.154	87.7889	106
16	Female	E3	Young	21.9	7.73026	42.936	83.7	79
17	Female	E3	Young	22	7.73026	37.905	83.7889	59
18	Female	E3	Young	19.9	7.73026	35.095	72.5333	99
19	Female	E3	Young	22.3	7.73026	56.83	94.4556	103
20	Female	E3	Young	22.3	7.56579	57.582	88.6889	32
21	Female	E3	Young	19.4	7.56579	57.316	93.9889	123
22	Female	E3	Young	23.4	7.56579	41.077	84.0889	69
23	Female	E3	Young	24.7	7.53289	61.996	89.8444	87
24	Female	E3	Young	24.3	7.53289	32.448	77.2	43
27	Female	E2	Young	22.6	7.73026	44.082	67.5	86
28	Female	E2	Young	28.3	7.73026	53.018	79.7889	64
29	Female	E3	Young	19.5	7.73026	47.247	81.5444	115
30	Female	E2	Young	23.4	7.73026	44.808	80.6556	104
31	Female	E2	Young	28.9	7.73026	52.417	74.3222	131
32	Female	E2	Young	25.7	7.73026	48.047	81.3444	122
33	Female	E2	Young	22.7	7.73026	66.929	89.1	79
34	Female	E2	Young	24.3	7.73026	55.489	87.4778	126
35	Female	E2	Young	21.8	7.73026	62.403	85.8222	114
36	Female	E2	Young	25.5	7.73026	41.232	69.0111	50
42	Female	KO	Young	28.2	7.36842	49.233	85.7111	62
43	Female	KO	Young	26.2	7.36842	49.679	87.7889	76
44	Female	KO	Young	22.4	7.36842	44.032	85.7444	32
45	Female	KO	Young	22.9	7.1	60.337	86.7667	102
46	Female	KO	Young	22.1	6.15132	50.078	89.6444	84
47	Female	KO	Young	19	6.15132	21.399	48	20
48	Female	KO	Young	22.3	6.15132	38.939	75.7111	70
49	Female	KO	Young	26.1	5.26316	39.093	78.0778	103
50	Female	KO	Young	24.6	5.26316	43.478	81.2556	100
51	Female	KO	Young	24.6	5.26316	42.082	80.1556	85
53	Male	E4	Young	32.7	7.5	48.609	83.6778	151
54	Male	E4	Young	25.3	7.5	47.492	80.5222	119
55	Male	E4	Young	29.5	7.5	43.189	77.7778	82
56	Male	E4	Young	27.9	7.5	23.443	60.5222	29
57	Male	E4	Young	29.3	7.40132	61.712	88.4	165
58	Male	E4	Young	34.9	7.40132	59.695	88.7	138
59	Male	E4	Young	28.5	7.40132	51.035	89.1667	96
60	Male	E4	Young	28.8	7.40132	37.534	79.6444	77
61	Male	E4	Young	30.9	7.13816	44.269	78.3111	86
62	Male	E4	Young	33.2	7.13816	52.594	85.4889	149
65	Male	E3	Young	27.6	7.76316	53.219	87.5778	136
66	Male	E3	Young	28.5	7.76316	39.135	77.2444	125
67	Male	E3	Young	29.8	7.76316	39.84	85.0222	101
68	Male	E3	Young	28.6	7.76316	37.431	86.5	49
69	Male	E3	Young	22.2	7.40132	39.888	77.2556	102
70	Male	E3	Young	31.7	7.40132	54.529	93.1667	124
71	Male	E3	Young	32	7.40132	41.663	84.9778	140
72	Male	E3	Young	28.1	7.40132	32.318	74.3222	47
73	Male	E3	Young	28.1	7.40132	49.21	84.0889	130
74	Male	E3	Young	31.6	7.43421	45.452	83.4667	171
79	Male	E2	Young	26.6	7.92763	61.162	92.0667	175
80	Male	E2	Young	28.8	7.92763	51.962	86.6667	68
81	Male	E2	Young	29.4	7.92763	65.021	88.4556	171
82	Male	E2	Young	26.3	7.92763	55.799	88.8	134
83	Male	E2	Young	25.9	7.92763	50.798	79.3889	107
84	Male	E2	Young	26.6	7.40132	59.202	76.0556	165
85	Male	E2	Young	29.1	7.40132	55.237	76.7778	160
86	Male	E2	Young	32.1	7.40132	64.676	81.3444	96
87	Male	E2	Young	27.3	7.40132	51.271	78.0444	159
88	Male	E2	Young	29.3	7.40132	70.542	90.1	59
93	Male	KO	Young	29.1	7.10526	54.169	81.0444	106
94	Male	KO	Young	27.8	7.10526	59.011	88.4	105
95	Male	KO	Young	30.4	7.10526	32.946	69.7	93
96	Male	KO	Young	29	7.10526	35.954	78.4333	77
97	Male	KO	Young	28	6.18421	39.379	76.4778	59
98	Male	KO	Young	23.4	6.18421	22.877	52.3	41
99	Male	KO	Young	31.3	6.18421	37.748	65.8	97
100	Male	KO	Young	32.6	6.18421	45.82	81.3778	94
101	Male	KO	Young	30.3	5.32895	45.576	79.5	152
102	Male	KO	Young	28.2	5.32895	36.348	69.1778	76
5836	Female	E4	Old	28.1	22.6316	36.002	68.0556	62
5837	Female	E4	Old	29.1	22.6316	34.441	66.5556	62
5838	Female	E4	Old	29.3	22.6316	53.708	79.6222	146
5839	Female	E4	Old	23.8	22.3026	58.312	84.5889	112
5840	Female	E4	Old	28.7	22.3026	47.14	81.6778	113
5841	Female	E4	Old	24	22.3026	34.389	68.4667	56
5842	Female	E4	Old	26.4	22.2368	38.696	68.2444	19
5843	Female	E4	Old	17.8	22.2368	22.581	41.2333	17
5844	Female	E4	Old	24.8	22.2368	39.241	72.1222	61
5845	Female	E4	Old	21.5	22.2368	14.02	27.2556	14
5815	Female	E3	Old	24.8	22.8618	37.398	69.3	65
5816	Female	E3	Old	25.5	22.8618	70	96.0778	85
5817	Female	E3	Old	33.7	22.8618	63.882	87.9667	89
5818	Female	E3	Old	23	22.8618	35.675	64.9889	98
5819	Female	E3	Old	24.1	21.7434	28.789	73.4333	68
5820	Female	E3	Old	22.6	21.7434	56.537	87.4556	141
5821	Female	E3	Old	24.5	21.7434	33.762	58.8889	24
5822	Female	E3	Old	23.7	21.7434	42.044	77.1889	59
5882	Female	E2	Old	19.3	22.5987	73.111	89.0889	126
5883	Female	E2	Old	23.8	22.6316	79.828	88.5222	126
5884	Female	E2	Old	23	22.6316	39.904	59.9778	34
5886	Female	E2	Old	28.9	22.4342	49.91	69.6667	104
5887	Female	E2	Old	30	22.4342	42.932	58.5111	51
5888	Female	E2	Old	21.1	22.4342	57.569	75.0222	103
5889	Female	E2	Old	25.9	22.4342	61.423	81.9	97
5890	Female	E2	Old	26	22.4342	47.253	64.9667	74
5891	Female	E2	Old	25.3	21.25	60.588	83.7778	145
5892	Female	E2	Old	28.1	21.25	69.274	88.2333	134
5857	Female	KO	Old	22	22.7303	35.552	64.3111	37
5858	Female	KO	Old	26.9	22.7303	52.759	72.2222	16
5859	Female	KO	Old	28.2	22.7303	32.944	67.1778	47
5860	Female	KO	Old	22.8	22.7303	22.343	42.6889	48
5862	Female	KO	Old	30.3	22.5987	25.797	59.9667	31
5861	Female	KO	Old	27	21.6776	33.953	62.9556	73
5826	Male	E4	Old	32.4	22.6645	39.959	69.3111	128
5827	Male	E4	Old	33.8	22.6645	22.402	44.0222	84
5828	Male	E4	Old		22.6645	32.296	59.5222	45
5829	Male	E4	Old	31.2	22.3355	55.109	81.5111	130
5830	Male	E4	Old	30.4	22.3355	23.455	45.2889	58
5832	Male	E4	Old	35.8	22.3355	23.583	44.0333	39
5801	Male	E3	Old	36.5	24.5066	32.072	61.0444	46
5803	Male	E3	Old	36.4	24.5066	33.429	65.5222	114
5804	Male	E3	Old	29.4	24.1447	35.68	72.9778	68
5806	Male	E3	Old	33.8	22.8947	40.95	82.1444	173
5807	Male	E3	Old	28.8	22.8947	16.574	45.4111	39
5808	Male	E3	Old	32.5	21.9737	44.295	82.5222	85
5811	Male	E3	Old	35.2	21.7763	33.857	70.3556	125
5812	Male	E3	Old	38.4	21.7763	35.696	74.2444	85
5813	Male	E3	Old	30.5	21.7763	47.994	85.3778	114
5869	Male	E2	Old	29.3	22.6974	52.142	79.6333	121
5870	Male	E2	Old	31.3	22.6974	69.527	80.6667	151
5871	Male	E2	Old	31.5	22.6974	61.043	79.8	174
5872	Male	E2	Old	30.9	22.5	65.537	86.1111	154
5873	Male	E2	Old	31.6	22.5	60.502	77.8667	106
5874	Male	E2	Old	30.6	22.5	46.755	69.0333	90
5875	Male	E2	Old	29.7	22.5	55.257	79.8556	145
5876	Male	E2	Old	31.9	22.5	59.345	78.5333	153
5877	Male	E2	Old	29.5	22.5	77.665	87.2111	131
5878	Male	E2	Old	32.6	22.5	62.44	86.5111	148
5880	Male	E2	Old	27	22.5	55.772	85.4778	145
5881	Male	E2	Old	31.1	22.5	50.111	76.6556	133
5846	Male	KO	Old	31.9	24.0789	24.414	45.7889	40
5847	Male	KO	Old	28.6	24.0789	30.699	53.3111	50
5848	Male	KO	Old	32.8	22.6974	29.229	54.6	87
5849	Male	KO	Old	29.4	22.6974	43.06	79.9667	79
5850	Male	KO	Old	29.4	22.6974	7.661	18.6333	18
5851	Male	KO	Old	31.2	23.4539	35.115	62.0222	77
5852	Male	KO	Old	28	22.5658	28.965	47.2444	86
5853	Male	KO	Old	30	22.5658	24.041	38.9111	49
5854	Male	KO	Old	32.2	22.5658	35.217	64.6778	55
5855	Male	KO	Old	30.9	22.5658	35.965	60.5667	52
5856	Male	KO	Old	20.2	22.5658	2.695	8.23333	6
11	Female	E4	Young	22.7	6.64474	62.09	91.4667	142
12	Female	E4	Young	26.6	6.64474	41.835	74.1444	67
13	Female	E4	Young	23.8	6.64474	64.09	91.9778	137
14	Female	E4	Young	27.1	6.64474	70.958	93.6556	196
25	Female	E2	Young	21.7	7.53289	46.905	82.4111	92
26	Female	E3	Young	23.5	7.53289	48.313	87.5	85
38	Female	E2	Young	26.1	6.25	50.579	79.8778	146
39	Female	E2	Young	28	6.25	53.605	84.6111	145
40	Female	E2	Young	24.4	6.25	53.757	80.2	125
41	Female	E2	Young	21.9	6.25	59.879	88.8667	148
52	Female	KO	Young	25.8	5.32895	28.041	60.9889	24
63	Male	E4	Young	32.5	7.13816	31.116	75.0556	103
64	Male	E4	Young	32.7	7.13816	52.752	86.9	89
75	Male	E3	Young	31.3	7.43421	44.512	77.8778	129
76	Male	E3	Young	29.7	7.43421	43.484	89.1889	64
77	Male	E3	Young	30.3	7.43421	50.745	85.9333	102
78	Male	E3	Young	33.4	7.43421	51.478	90.5778	116
89	Male	E2	Young	29.1	6.25	50.038	81.2889	149
90	Male	E2	Young	33.1	6.25	57.725	91.2667	192
91	Male	E2	Young	30.4	6.25	45.045	81.8222	138
92	Male	E2	Young	28.2	6.25	51.191	81.5333	125
103	Male	KO	Young	31.5	5.32895	32.142	61.5444	58
104	Male	KO	Young	29.2	5.32895	34.702	68.3444	33
5864	Male	E2	Old	36.9	24.7368	53.798	79.2889	117
5865	Male	E2	Old	33	24.7368	65.83	88	117
5866	Male	E2	Old	30.5	24.7368	68.21	87.1667	124
5867	Male	E2	Old	34.9	24.7368	32.972	49.3	96
5868	Male	E2	Old	34.8	24.7368	68.956	89.6556	98
