# Supplementary material for: APOE2 is associated with longevity independent of Alzheimer’s disease
Source: eLife. 2020 Oct 19;9:e62199. doi: 10.7554/eLife.62199 (PMC7588231; doi:10.7554/eLife.62199)
Supplement: Figure 4—source data 2. [file elife-62199-fig4-data2.xlsx]

## Sheet: Sheet1
ID	Sex	Genotype	Age group	CX apoE (μg/mg)	HP ApoE (μg/mg)	CSF apoE (μg/ml)	Plasma apoE (μg/ml)	CX PSD95 (μg/mg)	HP PSD95 (μg/mg)	CX GFAP (μg/mg)	HP GFAP (μg/mg)	CX CD11b (ng/mg)	HP CD11b (ng/mg)	CX IL1β (ng/mg)	CX TNFα (ng/mg)	Plasma CRP (μg/ml)	Plasma total cholesterol (mg/ml)	Plasma HDL cholesterol (mg/ml)	Plasma non-HDL cholesterol (mg/ml)	Plasma triglyceride (mg/ml)	Travel distance (m)	Time mobile (%)	Rearing events
5836	Female	E4	Old	0.467616	1.11619	1.153	17.82	2.85	2.75	64.73	88.3	327.636	266.102	137.015	221.824	3.33372	0.52975	0.264125	0.265625	0.468	36.002	68.0556	62
5837	Female	E4	Old	0.557928	0.88423	1.35017	22.94	2.3	3.16	50.63	103.87	314.108	247.991	131.195	275.338	3.6223	0.4705	0.244	0.2265	0.317125	34.441	66.5556	62
5838	Female	E4	Old	0.558233	1.05497	1.46	17.885	2.05	2.72	43.79	125.63	334.326	250.124	122.794	257.359	4.38468	0.4705	0.21425	0.25625	0.39	53.708	79.6222	146
5839	Female	E4	Old	0.511617	1.06915	1.13983	21.98	1.48	2.71	29.41	114.59	375.749	273.295	223.396	401.445	4.98668	0.594	0.25275	0.34125	0.564375	58.312	84.5889	112
5840	Female	E4	Old		0.996818	0.799667	18.605	1.57	3.01	24.7	75.97	348.873	243.148	223.87	338.106	0.986533	0.559	0.276	0.283	0.500375	47.14	81.6778	113
5841	Female	E4	Old	0.598185	1.1513	0.8295	20.7375	2.45	2.64	63.75	226.46	398.982	317.644	219.303	260.72	4.10992	0.45275	0.245	0.20775	0.32375	34.389	68.4667	56
5842	Female	E4	Old	0.716956	1.16655	0.636667	19.2575	2.21	2.72	53.81	143.14	341.898	242.609	168.127	202.277	4.68193	0.59375	0.26875	0.325	0.35025	38.696	68.2444	19
5843	Female	E4	Old	0.205359	0.978585	1.27267	14.5825	2.52	3.05	34.49	61.59	270.734	212.621	205.566	239.465	4.21758	0.39275	0.210813	0.181937	0.2835	22.581	41.2333	17
5844	Female	E4	Old	0.71533	1.24162		18.975	2.24	2.67	32.44	67.81	332.452	238.389	236.699	291.424	3.74493	0.4705	0.187062	0.283438	0.29025	39.241	72.1222	61
5845	Female	E4	Old	0.695908	0.97721	1.63017	13.6675	2.35	1.7	78.75	48.94	344.596	201.851	258.133	458.236	3.60405	0.56475	0.2585	0.30625	0.468	14.02	27.2556	14
5815	Female	E3	Old	0.561044	1.32604	1.4845	47.725	2.59	2.57	43.74	90.19	260.42	227.062	136.41	134.828	4.97423	0.5825	0.215375	0.367125	0.647125	37.398	69.3	65
5816	Female	E3	Old	1.13336	1.55128	2.0615	33.705	2.28	3.43	40.08	65.94	312.49	201.711	152.494	226.506	5.42415	0.5	0.248938	0.251062	0.37675	70	96.0778	85
5817	Female	E3	Old	0.785173	1.6032	1.62233	36.6725	2.78	3	29.04	73.61	315.73	309.816	179.547	213.805	6.6589	0.58225	0.263188	0.319063	0.500375	63.882	87.9667	89
5818	Female	E3	Old	0.617927	1.25349	1.11367	3.85	2.1	2.79	21.52	73.59	316.052	217.577	238.974	341.655						35.675	64.9889	98
5819	Female	E3	Old	0.810617	1.40898	1.39483	44.7325	2.17	2.97	30.45	74.3	344.105	252.759	281.774	469.005	5.9302	0.4945	0.168313	0.326187	0.577125	28.789	73.4333	68
5820	Female	E3	Old	0.999447	1.691	1.50017	34.3975	2.19	2.8	26.56	65.06	309.324	222.307	292.982	281.449	6.5226	0.652	0.181625	0.470375	0.29025	56.537	87.4556	141
5821	Female	E3	Old	0.789749	1.59736	1.98017	25.26	2.26	3.73	29.97	62.66	271.721	224.782	188.762	232.76	4.39712	0.512	0.235813	0.276188	0.343625	33.762	58.8889	24
5822	Female	E3	Old	1.00673	1.86501		27.59	2.12	2.51	32.61	88.11	321.594	239.41	193.369	354.989	3.5291	0.45875	0.226375	0.232375	0.754125	42.044	77.1889	59
5882	Female	E2	Old	1.79074	2.81181		186.77	2.36	2.63	44.47	83.33	349.171	241.848	332.469	427.301	6.79432	4.10825	0.191812	3.91644	2.68162	73.111	89.0889	126
5883	Female	E2	Old		2.79138	6.544	544.95	2.44	2.87	113.3		301.218	255.342	241.469	409.894	3.67552	2.0885	0.168313	1.92019	1.68087	79.828	88.5222	126
5884	Female	E2	Old	0.884323	1.96365	2.27133	330.715	2.82	2.7	49.96	113.3	370.992	197.115	200.712	210.077	4.32223	1.62175	0.238937	1.38281	0.95375	39.904	59.9778	34
5886	Female	E2	Old	1.50037	2.43842	2.30667	569.485	2.27	2.64	34.41	95.54	277.686	185.069	195.608	274.948	6.97442	2.974	0.234813	2.73919	4.11988	49.91	69.6667	104
5887	Female	E2	Old	1.09513	2.66801	4.553	125.66	2.49	2.85	48.95	97.5	340.025	241.569	242.541	371.994	4.55875	1.7035	0.1975	1.506	1.41637	42.932	58.5111	51
5888	Female	E2	Old	0.966073	2.11717	2.70683	326.15	2.3	2.28	25.47	66.76	299.402	203.941	209.473	320.735	3.7657	1.507	0.259437	1.24756	1.43475	57.569	75.0222	103
5889	Female	E2	Old	1.4643	2.84303	5.24583	364.2	2.63	2.85	65.67	221.81	309.54	224.102	260.946	409.817	3.83502	2.36425	0.202437	2.16181	1.35488	61.423	81.9	97
5890	Female	E2	Old	1.26984	2.39941	3.89533	704.995	2.58	3.11	40.33	93.07	343.304	208.061	305.722	464.468	6.35313	2.30975	0.264	2.04575	1.909	47.253	64.9667	74
5891	Female	E2	Old	0.986404	2.46169	6.45617	393.47	2.49	1.94	45.21	91.56	311.273	208.365	321.842	396.729	4.545	2.2615	0.265062	1.99644	1.95213	60.588	83.7778	145
5892	Female	E2	Old	1.14723	2.48605	4.11483	394.985	2.34	2.94	37.48	101.36	323.733	234.507	239.987	344.071	4.92468	2.526	0.260313	2.26569	1.94613	69.274	88.2333	134
5857	Female	KO	Old	0	0.0932672	0.003	0.28	2.4	2.84	67.83	188.85	371.654	273.701	298.509	480.653	4.04283	3.47175			0.564375	35.552	64.3111	37
5858	Female	KO	Old	0.0414481	0.0105844	0	0.58	2.67	2.94	45.62	61.14	365.634	236.03	255.439	422.502	5.6694	2.79025	0.131625	2.65862	0.729	52.759	72.2222	16
5859	Female	KO	Old	-0.052775	-0.0262442	0	0	2.73	2.3	39.83	79.87	376.097	231.566	217.657	348.751	3.90888	3.50975	0.101562	3.40819	0.589875	32.944	67.1778	47
5860	Female	KO	Old	-0.117901	0	0	0	2.96	2.23	33.87	67.6	331.855	202.837	191.876	352.905	3.90803	3.77575	0.151688	3.62406	0.722875	22.343	42.6889	48
5862	Female	KO	Old	0.0031824	0	0	0.38	3.12	2.32	39.32	98.19	443.118	239.985	226.943	391.979	5.42027	2.5315	0.146125	2.38537	0.703875	25.797	59.9667	31
5861	Female	KO	Old	-0.113679	-0.0115718		0.018	2.59	2.14	29.12	93.92	290.211	230.907	172.09	328.02						33.953	62.9556	73
5826	Male	E4	Old	0.32362	0.876873	1.4325	11.695	3.24	2.63	34.06	63.6	248.273	194.05	175.981	282.183	4.19807	0.7305	0.284562	0.445938	0.312125	39.959	69.3111	128
5827	Male	E4	Old	0.279091	0.786889	0.7655	14.505	3.5	2.15	28.93	29.9	306.544	180.719	274.52	424.538	4.63297	0.71325	0.304688	0.408563	0.346125	22.402	44.0222	84
5828	Male	E4	Old	0.377027	0.933493	0.648167	12.13	2.87	2.64	38.22	88.67	333.732	232.974	240.872	533.827	3.36202	0.42025	0.237125	0.183125	0.249875	32.296	59.5222	45
5829	Male	E4	Old	0.407295	0.929017	1.02783	24.8775	2.98	2.74	22.87	38.7	293.584	185.253	266.974	408.408	3.15335	0.48075	0.159812	0.320937	0.373375	55.109	81.5111	130
5830	Male	E4	Old	0.375776	0.925544	0.565	16.4875	3.29	2.64	50.36	105.87	317.958	205.305	231.112	421.987	4.5918	0.6255	0.256188	0.369312	0.21525	23.455	45.2889	58
5832	Male	E4	Old	0.450394	1.01312	0.974833	11.695	3.81	3.12	71.6	74.78	248.406	203.013	203.254	337.495	5.1646	0.77225	0.317437	0.454813	0.25	23.583	44.0333	39
5801	Male	E3	Old	1.0437	1.46553	1.804	31.43	1.8	3.17	28.44	51.31	421.803	206.635	257.358	407.815	5.2456	0.8855	0.327125	0.558375	0.318875	32.072	61.0444	46
5803	Male	E3	Old	0.882853	1.38667	0.73925	29.2375	1.93	2.86	26.25	59.49	257.068	226.374	218.074	226.702	4.52343	0.67025	0.29175	0.3785	0.26375	33.429	65.5222	114
5804	Male	E3	Old	0.752691	1.50546	1.60517	28.63	1.6	2.8	22.73	47.87	205.382	215.039	200.475	250.547	8.07933	1.00125	0.3155	0.68575	0.41425	35.68	72.9778	68
5806	Male	E3	Old	0.841148	1.51279	1.84933	24.175	1.72	2.93	17.79	53.41	288.199	235.268	179.406	240.162	5.15102	0.838	0.344375	0.493625	0.270625	40.95	82.1444	173
5807	Male	E3	Old	0.842593	1.52196	1.772	25.565	2.07	2.87	18.55	54.03	352.428	233.35	294.461	433.749	4.58693	0.58	0.268	0.312	0.30525	16.574	45.4111	39
5808	Male	E3	Old	0.859124	1.23448	1.53567	27.1425	1.77	2.95	18.8	56.06	337.137	214.738	332.178	552.315	7.78785	0.87	0.292375	0.577625	0.373375	44.295	82.5222	85
5811	Male	E3	Old	0.645876	1.22992	1.2505	29.3475	1.7	2.75	17.33	38.1	242.96	192.098	121.813	159.103	5.10737	0.58875	0.272188	0.316562	0.515125	33.857	70.3556	125
5812	Male	E3	Old	0.802586	1.3444	1.16433	50.2425	1.95	2.87	25.22	51.96	263.273	206.281	162.835	203.073	4.90343	0.7045	0.29575	0.40875	0.400625	35.696	74.2444	85
5813	Male	E3	Old	0.800561	1.16299	1.25167	22.5625	2.2	3.22	21.65	53.87	261.79	236.897	166.021	230.206	4.5441	0.36875	0.249625	0.119125	0.243	47.994	85.3778	114
5869	Male	E2	Old	1.36885	1.99462	0.687	513.835	1.91	2.98	44.35	67.71	293.377	216.644	306.808	408.815	4.32132	2.6455	0.29975	2.34575	1.882	52.142	79.6333	121
5870	Male	E2	Old	1.33998	2.06261	3.05033	505.325	1.81	3.33	40.62	71.67	328.788	220.073	282.971	399.223	5.49093	3.32175	0.29975	3.022	2.84388	69.527	80.6667	151
5871	Male	E2	Old	1.23356	1.93683	3.8935	384.225	1.68	2.65	37.14	66.96	351.733	215.07	278.624	556.793	3.91722	2.408	0.30175	2.10625	2.02188	61.043	79.8	174
5872	Male	E2	Old	1.3125	1.91515	2.38583	282.585	1.77	2.56	32.74	65.54	320.837	222.463	180.017	263.95	4.3115	2.36225	0.302687	2.05956	1.52462	65.537	86.1111	154
5873	Male	E2	Old	0.870896	2.09393	2.50267	331.19	1.7	2.8	34.44	111.73	276.652	229.781	243.809	319.002	4.77498	2.19425	0.3135	1.88075	1.58875	60.502	77.8667	106
5874	Male	E2	Old	0.999882	1.91605	2.729	365.1	1.75	2.71	34.39	78.93	335.605	212.264	245.841	414.976	4.95752	2.9765	0.310625	2.66588	2.24388	46.755	69.0333	90
5875	Male	E2	Old	1.52552	1.9841	1.86267	297.17	1.93	3.01	42.45	78.34	347.2	188.09	264.633	366.411	4.82962	2.193	0.310563	1.88244	1.67175	55.257	79.8556	145
5876	Male	E2	Old	1.68026	2.22647	2.25967	433.16	1.8	2.62	38.09	82.65	361.87	205.309	289.331	457.465	4.34757	3.8035	0.222875	3.58062	2.74938	59.345	78.5333	153
5877	Male	E2	Old	1.585	2.08422	1.2105	465.96	2.19	3.54	42.74	84.77	396.702	213.358	429.674	570.217	5.00947	2.629	0.29575	2.33325	2.23113	77.665	87.2111	131
5878	Male	E2	Old	1.6548	2.04115	1.297	347.85	2.06	3.13	41.25	77.55	394.509	214.787	394.897	584.059	4.33222	2.2175	0.306625	1.91087	1.86938	62.44	86.5111	148
5880	Male	E2	Old	1.52358	2.03708	2.51283	488.24	1.87	3	24.92	56.77	362.592	226.624	321.364	419.242	6.81913	3.27925	0.255125	3.02413	2.3135	55.772	85.4778	145
5881	Male	E2	Old	1.72118	2.22322	5.371	738.95	1.92	3.07	36.48	67.44	349.764	199.906	371.684	496.875	5.79433	3.54025	0.325188	3.21506	3.07063	50.111	76.6556	133
5846	Male	KO	Old	0.0500289	0.0399877	0	0	1.63	2.89	26.89	67.3	328.506	219.244	260.07	432.397	5.5248	4.85275	0.189062	4.66369	0.813	24.414	45.7889	40
5847	Male	KO	Old	-0.045693	-0.0262521	0	0	1.99	2.59	28.76	49.01	314.804	171.121	206.729	342.679	5.09868	4.71825	0.168063	4.55019	0.871875	30.699	53.3111	50
5848	Male	KO	Old	-0.055165	-0.00740863	0	0	1.81	2.81	28.5	53.11	330.404	191.762	254.165	360.071						29.229	54.6	87
5849	Male	KO	Old	-0.032773	-0.00422235	0	0	1.83	2.6	28.9	59.01	354.164	232.167	209.337	325.436	5.8886	4.894	0.069625	4.82437	0.635125	43.06	79.9667	79
5850	Male	KO	Old	-0.052586	0.00103486	0	0	1.88	2.6	28.75	39.98	236.273	176.786	200.202	296.482	4.13787	5.33275	0.115625	5.21713	1.742	7.661	18.6333	18
5851	Male	KO	Old	0.0266581	-0.00613561	0	0	2.08	3.13	24.44	53.09	286.256	178.256	251.21	356.995	6.76462	4.677	0.115375	4.56162	0.720875	35.115	62.0222	77
5852	Male	KO	Old	0.0484279	-0.0189958	0	0	1.89	2.75	23.82	64.23	327.153	211.473	231.3	333.232	5.74095	7.15875	0.2	6.95875	1.46063	28.965	47.2444	86
5853	Male	KO	Old	0.0550254	0.00197893	0	0.019	1.79	2.83	23.89	56.54	427.19	220.367	308.304	512.986	4.34723	2.97125	0.19875	2.7725	0.53525	24.041	38.9111	49
5854	Male	KO	Old	0.079526	0.00265762	0	0.3065	1.8	2.58	24.99	53.41	324.059	222.948	264.709	430.03	4.99433	4.413	0.156438	4.25656	0.82625	35.217	64.6778	55
5855	Male	KO	Old	0.0478769	-0.00540896	0	0	2.09	2.52	23.12	45.34	357.953	223.124	322.408	568.012	4.51673	4.57475	0.16775	4.407	0.9035	35.965	60.5667	52
5856	Male	KO	Old	0.040656	0.0140991	0.002	0	1.97	2.56	19.57	118.29	273.999	218.686	237.952	459.47	4.38583	6.0055	0.128812	5.87669	1.0975	2.695	8.23333	6
5864	Male	E2	Old	1.20377	2.05582		393.745	1.83	2.59	45.81	81.31	320.973	223.295	237.29	403.826	4.4803	3.067	0.321688	2.74531	3.869	53.798	79.2889	117
5865	Male	E2	Old	1.36558	2.12296	1.2615	457.175	2.37	3.09	46.96	83.63	287.591	185.253	207.908	371.779	4.03962	2.15425	0.3115	1.84275	1.9295	65.83	88	117
5866	Male	E2	Old	1.27157	1.9923	5.08683	430.94	2.34	2.93	33.73	83.33	337.722	226.107	248.987	354.69	4.71625	2.87575	0.309375	2.56637	2.35688	68.21	87.1667	124
5867	Male	E2	Old	1.43097	2.21926	3.91667	354.255	2.37	3.15	34.87	66.36	345.392	208.581	281.971	408.25	4.85038	2.9685	0.3125	2.656	2.72463	32.972	49.3	96
5868	Male	E2	Old	1.19397	2.26239	2.86683	504.775	2.3	2.57	39.3	71.91	265.874	224.791	283.409	420.947	4.50887	3.328	0.301187	3.02681	2.9425	68.956	89.6556	98
