# Supplementary material for: APOE2 is associated with longevity independent of Alzheimer’s disease
Source: eLife. 2020 Oct 19;9:e62199. doi: 10.7554/eLife.62199 (PMC7588231; doi:10.7554/eLife.62199)
Supplement: Figure 4—source data 3. [file elife-62199-fig4-data3.xlsx]

## Sheet: raw data of Fig4I_K
ID	Sex	Genotype	Age group	CX Cholesterol (nmol/mg)	CX apoE (μg/mg)	Travel distance (m)	Time mobile (%)	Rearing events
5826	male	E4	Old		0.32362	39.959	69.3111	128
5828	male	E4	Old	430.44	0.377027	32.296	59.5222	45
5829	male	E4	Old	432.52	0.407295	55.109	81.5111	130
5830	male	E4	Old	440.81	0.375776	23.455	45.2889	58
5801	male	E3	Old	449.43	1.0437	32.072	61.0444	46
5803	male	E3	Old	412.36	0.882853	33.429	65.5222	114
5807	male	E3	Old	407.79	0.842593	16.574	45.4111	39
5808	male	E3	Old	417.88	0.859124	44.295	82.5222	85
5870	male	E2	Old	395.35	1.33998	69.527	80.6667	151
5876	male	E2	Old	405.9	1.68026	59.345	78.5333	153
5877	male	E2	Old	392.71	1.585	77.665	87.2111	131
5881	male	E2	Old	380.45	1.72118	50.111	76.6556	133
5848	male	KO	Old	444.83	-0.055165	29.229	54.6	87
5849	male	KO	Old	434.78	-0.032773	43.06	79.9667	79
5852	male	KO	Old	454.7	0.0484279	28.965	47.2444	86
5854	male	KO	Old	460.05	0.079526	35.217	64.6778	55
