# Supplementary material for: APOE2 is associated with longevity independent of Alzheimer’s disease
Source: eLife journal article supplement (doi:10.7554/elife.62199), 2020-10-19
Supplement: supp [file elife_poa_e62199_Figure_4_source_data_4.xlsx]

## Sheet: raw data of Fig4Q&R
ID	Sex	Genotype	Age Group	Plasma total cholesterol (mg/ml)	Plasma HDL cholesterol (mg/ml)	Plasma non-HDL cholesterol (mg/ml)	Plasma triglyceride (mg/ml)
4	Female	E4	Young	0.66325	0.257063	0.406187	0.68275
8	Female	E4	Young	0.64925	0.102125	0.547125	0.477875
9	Female	E4	Young	0.5815	0.120875	0.460625	0.30325
15	Female	E3	Young	0.649	0.224	0.425	1.216
16	Female	E3	Young	0.567	0.195188	0.371812	0.34225
17	Female	E3	Young	0.40775	0.258125	0.149625	0.43275
18	Female	E3	Young	0.4335	0.146375	0.287125	0.4585
19	Female	E3	Young	0.58225	0.202375	0.379875	1.03238
20	Female	E3	Young	0.60375	0.276438	0.327313	0.400375
21	Female	E3	Young	0.53625	0.209313	0.326937	0.29
22	Female	E3	Young	0.41725	0.121313	0.295938	0.471375
23	Female	E3	Young	0.58175	0.239187	0.342562	0.5485
24	Female	E3	Young	0.70025	0.271375	0.428875	0.5805
27	Female	E2	Young	1.97375	0.144875	1.82887	1.44375
28	Female	E2	Young	3.0105	0.226	2.7845	1.82975
29	Female	E3	Young	0.67075	0.243438	0.427312	1.03862
30	Female	E2	Young	2.0195	0.258062	1.76144	1.40575
31	Female	E2	Young	3.0105	0.371812	2.63869	2.656
32	Female	E2	Young	2.7065	0.304812	2.40169	2.15313
33	Female	E2	Young	2.1905	0.214875	1.97563	1.48812
34	Female	E2	Young	3.06425	0.213875	2.85038	2.44563
35	Female	E2	Young	2.63475	0.22175	2.413	1.37413
36	Female	E2	Young	2.63475	0.247625	2.38712	1.48175
42	Female	KO	Young	1.65325	0.15925	1.494	0.841875
43	Female	KO	Young	3.31075	0.146	3.16475	0.810125
44	Female	KO	Young	2.3085	0.131875	2.17663	0.5805
45	Female	KO	Young	3.3795	0.182312	3.19719	0.638125
46	Female	KO	Young	2.38525	0.251563	2.13369	0.477875
47	Female	KO	Young	3.02675	0.368812	2.65794	0.70825
48	Female	KO	Young	2.741	0.14725	2.59375	0.70875
49	Female	KO	Young	2.365	0.194875	2.17013	0.664
50	Female	KO	Young	2.891	0.194688	2.69631	0.68325
51	Female	KO	Young	1.69475	0.166813	1.52794	0.65125
56	Male	E4	Young	0.71825	0.314563	0.403688	0.3405
57	Male	E4	Young	0.7125	0.317875	0.394625	0.5615
60	Male	E4	Young	0.74175	0.257937	0.483813	0.568
65	Male	E3	Young	0.5875	0.312875	0.274625	0.399625
66	Male	E3	Young	0.7185	0.340687	0.377813	0.46475
67	Male	E3	Young	0.6295	0.322	0.3075	0.3865
68	Male	E3	Young	0.70675	0.326937	0.379812	0.47775
69	Male	E3	Young	0.5815	0.26925	0.31225	0.464625
70	Male	E3	Young
71	Male	E3	Young	0.677	0.27925	0.39775	0.580875
72	Male	E3	Young	0.66525	0.312	0.35325	0.386375
73	Male	E3	Young
74	Male	E3	Young	0.66525	0.349438	0.315812	0.386375
79	Male	E2	Young	1.9825	0.295938	1.68656	2.35213
80	Male	E2	Young	2.00975	0.33575	1.674	2.82412
81	Male	E2	Young	2.88075	0.317875	2.56288	2.53662
82	Male	E2	Young
83	Male	E2	Young	1.75925	0.267375	1.49188	1.64025
84	Male	E2	Young
85	Male	E2	Young	2.24225	0.256937	1.98531	2.03
86	Male	E2	Young
87	Male	E2	Young	2.1345	0.251063	1.88344	1.66538
88	Male	E2	Young
93	Male	KO	Young	2.6185	0.2305	2.388	1.00612
94	Male	KO	Young	2.19375	0.100562	2.09319	0.574375
95	Male	KO	Young	2.1975	0.13675	2.06075	0.45175
96	Male	KO	Young	2.47375	0.211188	2.26256	0.854625
97	Male	KO	Young	2.6665	0.196125	2.47038	1.15712
98	Male	KO	Young	1.939			0.294
99	Male	KO	Young	2.2315	0.211188	2.02031	1.3015
100	Male	KO	Young	2.479	0.216	2.263	0.999875
101	Male	KO	Young	3.13625	0.226438	2.90981	0.991
102	Male	KO	Young	2.97425	0.210813	2.76344	0.716625
5836	Female	E4	Old	0.52975	0.264125	0.265625	0.468
5837	Female	E4	Old	0.4705	0.244	0.2265	0.317125
5838	Female	E4	Old	0.4705	0.21425	0.25625	0.39
5839	Female	E4	Old	0.594	0.25275	0.34125	0.564375
5840	Female	E4	Old	0.559	0.276	0.283	0.500375
5841	Female	E4	Old	0.45275	0.245	0.20775	0.32375
5842	Female	E4	Old	0.59375	0.26875	0.325	0.35025
5843	Female	E4	Old	0.39275	0.210813	0.181937	0.2835
5844	Female	E4	Old	0.4705	0.187062	0.283438	0.29025
5845	Female	E4	Old	0.56475	0.2585	0.30625	0.468
5815	Female	E3	Old	0.5825	0.215375	0.367125	0.647125
5816	Female	E3	Old	0.5	0.248938	0.251062	0.37675
5817	Female	E3	Old	0.58225	0.263188	0.319063	0.500375
5818	Female	E3	Old
5819	Female	E3	Old	0.4945	0.168313	0.326187	0.577125
5820	Female	E3	Old	0.652	0.181625	0.470375	0.29025
5821	Female	E3	Old	0.512	0.235813	0.276188	0.343625
5822	Female	E3	Old	0.45875	0.226375	0.232375	0.754125
5882	Female	E2	Old	4.10825	0.191812	3.91644	2.68162
5883	Female	E2	Old	2.0885	0.168313	1.92019	1.68087
5884	Female	E2	Old	1.62175	0.238937	1.38281	0.95375
5886	Female	E2	Old	2.974	0.234813	2.73919	4.11988
5887	Female	E2	Old	1.7035	0.1975	1.506	1.41637
5888	Female	E2	Old	1.507	0.259437	1.24756	1.43475
5889	Female	E2	Old	2.36425	0.202437	2.16181	1.35488
5890	Female	E2	Old	2.30975	0.264	2.04575	1.909
5891	Female	E2	Old	2.2615	0.265062	1.99644	1.95213
5892	Female	E2	Old	2.526	0.260313	2.26569	1.94613
5857	Female	KO	Old	3.47175			0.564375
5858	Female	KO	Old	2.79025	0.131625	2.65862	0.729
5859	Female	KO	Old	3.50975	0.101562	3.40819	0.589875
5860	Female	KO	Old	3.77575	0.151688	3.62406	0.722875
5862	Female	KO	Old	2.5315	0.146125	2.38537	0.703875
5861	Female	KO	Old
5826	Male	E4	Old	0.7305	0.284562	0.445938	0.312125
5827	Male	E4	Old	0.71325	0.304688	0.408563	0.346125
5828	Male	E4	Old	0.42025	0.237125	0.183125	0.249875
5829	Male	E4	Old	0.48075	0.159812	0.320937	0.373375
5830	Male	E4	Old	0.6255	0.256188	0.369312	0.21525
5832	Male	E4	Old	0.77225	0.317437	0.454813	0.25
5801	Male	E3	Old	0.8855	0.327125	0.558375	0.318875
5803	Male	E3	Old	0.67025	0.29175	0.3785	0.26375
5804	Male	E3	Old	1.00125	0.3155	0.68575	0.41425
5806	Male	E3	Old	0.838	0.344375	0.493625	0.270625
5807	Male	E3	Old	0.58	0.268	0.312	0.30525
5808	Male	E3	Old	0.87	0.292375	0.577625	0.373375
5811	Male	E3	Old	0.58875	0.272188	0.316562	0.515125
5812	Male	E3	Old	0.7045	0.29575	0.40875	0.400625
5813	Male	E3	Old	0.36875	0.249625	0.119125	0.243
5869	Male	E2	Old	2.6455	0.29975	2.34575	1.882
5870	Male	E2	Old	3.32175	0.29975	3.022	2.84388
5871	Male	E2	Old	2.408	0.30175	2.10625	2.02188
5872	Male	E2	Old	2.36225	0.302687	2.05956	1.52462
5873	Male	E2	Old	2.19425	0.3135	1.88075	1.58875
5874	Male	E2	Old	2.9765	0.310625	2.66588	2.24388
5875	Male	E2	Old	2.193	0.310563	1.88244	1.67175
5876	Male	E2	Old	3.8035	0.222875	3.58062	2.74938
5877	Male	E2	Old	2.629	0.29575	2.33325	2.23113
5878	Male	E2	Old	2.2175	0.306625	1.91087	1.86938
5880	Male	E2	Old	3.27925	0.255125	3.02413	2.3135
5881	Male	E2	Old	3.54025	0.325188	3.21506	3.07063
5846	Male	KO	Old	4.85275	0.189062	4.66369	0.813
5847	Male	KO	Old	4.71825	0.168063	4.55019	0.871875
5848	Male	KO	Old
5849	Male	KO	Old	4.894	0.069625	4.82437	0.635125
5850	Male	KO	Old	5.33275	0.115625	5.21713	1.742
5851	Male	KO	Old	4.677	0.115375	4.56162	0.720875
5852	Male	KO	Old	7.15875	0.2	6.95875	1.46063
5853	Male	KO	Old	2.97125	0.19875	2.7725	0.53525
5854	Male	KO	Old	4.413	0.156438	4.25656	0.82625
5855	Male	KO	Old	4.57475	0.16775	4.407	0.9035
5856	Male	KO	Old	6.0055	0.128812	5.87669	1.0975
11	Female	E4	Young	0.616	0.254812	0.361187	0.591375
14	Female	E4	Young	0.6345	0.25475	0.37975	0.991125
25	Female	E2	Young	2.71325	0.27625	2.437	1.65637
26	Female	E3	Young	0.61575	0.267688	0.348062	0.48325
38	Female	E2	Young	2.02575	0.24825	1.7775	1.50825
39	Female	E2	Young	2.1835	0.26775	1.91575	2.83062
40	Female	E2	Young	1.50225	0.0895	1.41275	1.48313
41	Female	E2	Young	2.28225	0.23475	2.0475	1.71375
52	Female	KO	Young	2.7015	0.19375	2.50775	0.605625
64	Male	E4	Young	0.78825	0.331875	0.456375	0.808
75	Male	E3	Young	0.75175	0.382625	0.369125	0.48325
76	Male	E3	Young	0.65925	0.332875	0.326375	0.475875
77	Male	E3	Young	0.684	0.319625	0.364375	0.386625
78	Male	E3	Young	0.71475	0.351062	0.363687	0.619625
89	Male	E2	Young	1.9905	0.32975	1.66075	2.31887
90	Male	E2	Young	1.59675	0.370375	1.22637	1.62437
91	Male	E2	Young	2.07825	0.3135	1.76475	2.11238
92	Male	E2	Young	1.87325	0.320625	1.55263	2.15638
103	Male	KO	Young	1.979			0.577125
104	Male	KO	Young	3.46125	0.208687	3.25256	1.0645
5864	Male	E2	Old	3.067	0.321688	2.74531	3.869
5865	Male	E2	Old	2.15425	0.3115	1.84275	1.9295
5866	Male	E2	Old	2.87575	0.309375	2.56637	2.35688
5867	Male	E2	Old	2.9685	0.3125	2.656	2.72463
5868	Male	E2	Old	3.328	0.301187	3.02681	2.9425
